# Supplementary material
Source: PubMed Central journal article supplement (PMC3162477)
Supplement: NIHMS36017-supplement-2.pdf [file NIHMS36017-supplement-2.pdf]

## Supplementary Information Methods.

### *GPS, IMU and anemometer processing*

GPS data were post-processed differentially over the short baseline between base station and pigeons using Waypoint GrafNav 8.10. L1 C/A code pseudorange measurements were used to calculate the position of each GPS logger, with velocity determined from L1 Doppler measurements. This approach can deliver position accuracy to 0.5m and speed accuracy better than 0.1m/s. Accuracy in relative position between receivers is likely to be considerably better due to cancellation of offsets arising from common local error sources. Wind speeds varied from very light ((0.04-0.80m/s) to moderate (maximally 4.77m/s) over the two days of measurement covering seven bouts of flying. From these measurements, we determined horizontal and vertical groundspeed,  $V_{GPS}$  and  $V_z$  respectively (from GPS alone), relative airspeed  $V_{air}$  (GPS speeds combined with anemometer measurements) and flap timing (from dorsal acceleration). For each flap, we calculated the mean dorsal acceleration  $\overline{a_{dorsal}}$  and mean rostral acceleration  $\overline{a_{rostral}}$  from accelerometers. Average whole-flight rostral accelerations were subtracted from  $\overline{a_{dorsal}}$  to remove effect of cross-talk from dorsal acceleration. Gyroscope measurements were integrated over each flap, providing net pitch  $\Delta\theta_{flap}$  and yaw  $\Delta\phi_{flap}$  angular displacements. Also, for every pigeon for every flap, the location of all other pigeons relative to the instantaneous direction of travel was calculated and used to determine two 'Flock Factors'  $FF$ :  $FF_{ahead}$  represents the proportion of the forward hemisphere view covered by other pigeons (assuming every pigeon to have a representative span of 0.5m);  $FF_{behind}$  the proportion of the trailing hemisphere view.

### *Turning and banking calculations*

Average centripetal accelerations  $a_{centrip}$  over five wingbeats were calculated from GPS velocity measurements. In order to avoid sideslip during a

turn, thereby both loading the wings evenly and minimising induced power, the pigeon should roll and maintain a bank angle  $\psi$  :

$$\psi = \tan^{-1} \left( \frac{a_{centrip}}{g} \right).$$

If this is achieved, the net acceleration should act dorsally:

$$a_{dorsal} = \sqrt{g^2 + a_{centrip}^2}.$$

The pigeon, flying with an angular turn rate  $\Omega$ , would pitch and yaw every flap over each flap period  $T$ :

$$\Delta\theta_{flap} = \Omega T \sin(\psi)$$

$$\Delta\phi_{flap} = \Omega T \cos(\psi)$$

Table SI 1. Partial regression coefficients and statistical parameters for frequency (in Hz).

|                                | Estimate               | SE                    | DF | SS     | F statistic | p value |
|--------------------------------|------------------------|-----------------------|----|--------|-------------|---------|
| Partial regression coefficient |                        |                       |    |        |             |         |
| Constant                       | 11.46                  | 0.580                 |    |        |             |         |
| $K_1$                          | -1.16                  | 0.122                 | 1  | 15.7   | 95.8        | <0.0001 |
| $K_2$                          | 0.0783                 | 0.00846               | 1  | 99.6   | 606         | <0.0001 |
| $K_3$                          | -0.00168               | 0.000195              | 1  | 5.27   | 32.0        | <0.0001 |
| $K_4$                          | 0.201                  | 0.00411               | 1  | 12400  | 75500       | <0.0001 |
| $K_5$                          | $-6.71 \times 10^{-3}$ | 0.000303              | 1  | 1320   | 8010        | <0.0001 |
| $K_6$                          | 0.0000746              | $6.83 \times 10^{-6}$ | 1  | 40.5   | 247         | <0.0001 |
| $K_7$                          | 0.0235                 | 0.00121               | 1  | 95.5   | 581         | <0.0001 |
| $K_8$                          | 0.00973                | 0.000341              | 1  | 67.9   | 413         | <0.0001 |
| $K_9$                          | -0.000589              | 0.000158              | 1  | 0.676  | 4.11        | 0.043   |
| $K_{10}$                       | 0.0119                 | 0.000158              | 1  | 1780   | 10800       | <0.0001 |
| $K_{11}$                       | -0.000150              | $6.02 \times 10^{-6}$ | 1  | 8.54   | 52.0        | <0.0001 |
| $K_{12}$                       | $-4.21 \times 10^{-6}$ | $2.63 \times 10^{-7}$ | 1  | 37.4   | 227         | <0.0001 |
| $K_{13}$                       | 7.44                   | 0.281                 | 1  | 75.4   | 459         | <0.0001 |
| $K_{14}$                       | -164                   | 9.29                  | 1  | 29.8   | 181         | <0.0001 |
| $K_{15}$                       | 1060                   | 78.1                  | 1  | 19.6   | 119         | <0.0001 |
| $K_{16}$                       | 2.81                   | 0.278                 | 1  | 47.8   | 291         | <0.0001 |
| $K_{17}$                       | -33.4                  | 9.14                  | 1  | 4.02   | 24.4        | <0.0001 |
| $K_{17}$                       | 135                    | 76.21                 | 1  | 0.0843 | 0.513       | 0.47    |
| <i>Pigeon 1</i>                | -0.227                 | 0.00536               |    |        |             |         |
| <i>Pigeon 2</i>                | 0.500                  | 0.00766               |    |        |             |         |
| <i>Pigeon 3</i>                | -0.0413                | 0.00692               |    |        |             |         |
| <i>Pigeon 4</i>                | -0.0703                | 0.00569               |    |        |             |         |
| <i>Pigeon 5</i>                | 0.598                  | 0.00576               |    |        |             |         |
| <i>Pigeon 6</i>                | -0.017                 | 0.00543               |    |        |             |         |
| <i>Pigeon 7</i>                | -0.189                 | 0.00493               |    |        |             |         |
| <i>Pigeon 8</i>                | 0.289                  | 0.00504               |    |        |             |         |
| <i>Pigeon 9</i>                | 0.289                  | 0.00530               |    |        |             |         |
| <i>Pigeon 10</i>               | 0.297                  | 0.00530               |    |        |             |         |
| <i>Pigeon 11</i>               | 0.462                  | 0.00783               |    |        |             |         |
| <i>Pigeon 12</i>               | 0.0548                 | 0.00570               |    |        |             |         |
| <i>Pigeon 13</i>               | 0.110                  | 0.00665               |    |        |             |         |
| <i>Pigeon 14</i>               | 0.438                  | 0.00616               |    |        |             |         |
| <i>Pigeon 15</i>               | 0.123                  | 0.00524               |    |        |             |         |
| <i>Pigeon 16</i>               | -0.0287                | 0.00496               |    |        |             |         |
| <i>Pigeon 17</i>               | 0.275                  | 0.00541               |    |        |             |         |
| <i>Pigeon 18</i>               | 0.474                  | 0.00541               |    |        |             |         |
| Pigeons                        |                        |                       | 18 | 9980   | 3370        | <0.0001 |

Table SI 2. Partial regression coefficients and statistical parameters for dorsal body-motion amplitude (in meters).

|                                | Estimate               | SE                     | DF | SS                     | F statistic | p value |
|--------------------------------|------------------------|------------------------|----|------------------------|-------------|---------|
| Partial regression coefficient |                        |                        |    |                        |             |         |
| Constant                       | 0.0109                 | 0.00209                |    |                        |             |         |
| $K_1$                          | 0.00161                | 0.000440               | 1  | 0.000290               | 135         | <0.0001 |
| $K_2$                          | -0.000142              | 0.0000306              | 1  | 0.0000417              | 19.5        | <0.0001 |
| $K_3$                          | $3.84 \times 10^{-6}$  | $7.03 \times 10^{-7}$  | 1  | $4.28 \times 10^{-6}$  | 2.00        | 0.16    |
| $K_4$                          | -0.000524              | 0.0000148              | 1  | 0.0226                 | 10500       | <0.0001 |
| $K_5$                          | 0.0000213              | $1.09 \times 10^{-6}$  | 1  | $9.227 \times 10^{-6}$ | 4.30        | 0.038   |
| $K_6$                          | $-3.70 \times 10^{-7}$ | $2.47 \times 10^{-8}$  | 1  | $7.65 \times 10^{-6}$  | 3.57        | 0.059   |
| $K_7$                          | 0.0000119              | $4.38 \times 10^{-6}$  | 1  | 0.0000205              | 9.57        | 0.002   |
| $K_8$                          | 0.0000210              | $1.23 \times 10^{-6}$  | 1  | 0.0000980              | 45.7        | <0.0001 |
| $K_9$                          | $1.41 \times 10^{-6}$  | $5.72 \times 10^{-7}$  | 1  | $8.69 \times 10^{-6}$  | 4.05        | 0.044   |
| $K_{10}$                       | 0.0000667              | $5.69 \times 10^{-7}$  | 1  | 0.0289                 | 13500       | <0.0001 |
| $K_{11}$                       | $-1.02 \times 10^{-7}$ | $2.18 \times 10^{-8}$  | 1  | 0.00888                | 4140        | <0.0001 |
| $K_{12}$                       | $-3.43 \times 10^{-8}$ | $9.50 \times 10^{-10}$ | 1  | 0.00187                | 871         | <0.0001 |
| $K_{13}$                       | -0.0418                | 0.00101                | 1  | 0.00117                | 545         | <0.0001 |
| $K_{14}$                       | 1.07                   | 0.0336                 | 1  | 0.00126                | 587         | <0.0001 |
| $K_{15}$                       | -7.42                  | 0.282                  | 1  | 0.00119                | 555         | <0.0001 |
| $K_{16}$                       | -0.0349                | 0.00101                | 1  | 0.00121                | 565         | <0.0001 |
| $K_{17}$                       | 0.872                  | 0.0330                 | 1  | 0.00130                | 606         | <0.0001 |
| $K_{17}$                       | -5.84                  | 0.275                  | 1  | 0.000857               | 399         | <0.0001 |
| <i>Pigeon 1</i>                | 0.000693               | 0.0000193              |    |                        |             |         |
| <i>Pigeon 2</i>                | 0.000811               | 0.0000277              |    |                        |             |         |
| <i>Pigeon 3</i>                | 0.00114                | 0.0000250              |    |                        |             |         |
| <i>Pigeon 4</i>                | 0.000152               | 0.0000205              |    |                        |             |         |
| <i>Pigeon 5</i>                | -0.000908              | 0.0000208              |    |                        |             |         |
| <i>Pigeon 6</i>                | -0.00185               | 0.0000196              |    |                        |             |         |
| <i>Pigeon 7</i>                | -0.000736              | 0.0000178              |    |                        |             |         |
| <i>Pigeon 8</i>                | -0.000924              | 0.0000182              |    |                        |             |         |
| <i>Pigeon 9</i>                | -0.00124               | 0.0000191              |    |                        |             |         |
| <i>Pigeon 10</i>               | 0.00105                | 0.0000192              |    |                        |             |         |
| <i>Pigeon 11</i>               | -0.000914              | 0.0000283              |    |                        |             |         |
| <i>Pigeon 12</i>               | 0.000560               | 0.0000206              |    |                        |             |         |
| <i>Pigeon 13</i>               | -0.000792              | 0.0000240              |    |                        |             |         |
| <i>Pigeon 14</i>               | -0.00217               | 0.0000222              |    |                        |             |         |
| <i>Pigeon 15</i>               | 0.000185               | 0.0000189              |    |                        |             |         |
| <i>Pigeon 16</i>               | 0.000244               | 0.0000179              |    |                        |             |         |
| <i>Pigeon 17</i>               | -0.00191               | 0.0000196              |    |                        |             |         |
| <i>Pigeon 18</i>               | -0.000513              | 0.0000195              |    |                        |             |         |
| Pigeons                        |                        |                        | 18 | 0.143                  | 3710        | <0.0001 |
